# Supplementary material
Source: PubMed Central journal article supplement (PMC1805513)
Supplement: pnas_0611479104_3.pdf [file pnas_0611479104_3.pdf]

**Table 2** Genes, genomic location, size and percentage of polymorphic sites among mitochondrial and nuclear loci examined from *Phytophthora infestans*

| Fragment   | Gene                                          | Genomic Location | n  | Size of sequenced fragment (bp) | Size of Unambiguously aligned region (bp) | No (%) of polymorphic nucleotide sites |                        | No (%) of polymorphic nucleotide sites |                        |
|------------|-----------------------------------------------|------------------|----|---------------------------------|-------------------------------------------|----------------------------------------|------------------------|----------------------------------------|------------------------|
|            |                                               |                  |    |                                 |                                           | Potato                                 | <i>Anarrhichomenum</i> | Potato                                 | <i>Anarrhichomenum</i> |
| Intron Ras | Non-coding                                    | Nucleus          | 88 | 349                             | 224                                       | 5 (2.23)                               | 15 (6.69)              | 0                                      | ND                     |
| Ras        | <i>PiYpt1</i>                                 | Nucleus          | 79 | 600                             | 542                                       | 7 (1.29)                               | -----                  | 0                                      | ND                     |
| B-Tubulin  | <i>β-tubulin</i>                              | Nucleus          | 78 | 542                             | 490                                       | 1 (0.20)                               | -----                  | 0                                      | ND                     |
| P3         | <i>rpl14</i> ,<br><i>rp15</i><br><i>tRNAs</i> | Mitochondria     | 66 | 1308                            | 1180                                      | 9 (0.76)                               | 17 (1.44)              | 4                                      | 7                      |
| P4         | <i>cox 1</i>                                  | Mitochondria     | 79 | 964                             | 832                                       | 4 (0.48)                               | 12 (1.44)              | 0                                      | 0                      |

n = number of isolates sequenced

Potato isolates include wild *Solanum* species and tomato isolates and section *Anarrhichomenum* includes isolates of the Ic haplotype of *P. andina* from *Solanum tetrapetalum*.

ND = Not determined

Two synonymous substitutions were found (Glutamine and Asparagine) in amino acids for Ras

One synonymous substitution was found (Histidine) in amino acid for B-Tubulin
