# Supplementary material
Source: PubMed Central journal article supplement (PMC1805513)
Supplement: pnas_0611479104_5.pdf [file pnas_0611479104_5.pdf]

**Table 4** Population subdivision at mitochondrial loci according to Hudson's test statistics Ks (upper right matrix) and Kst (lower left matrix)

|               | <b>Bolivia</b>  | <b>Brazil</b>   | <b>Peru</b>     | <b>Ecuador</b>  | <b>Ecuador Anarr</b> | <b>Costa Rica</b> | <b>Mexico</b>   | <b>USA</b>       | <b>Ireland</b>  |
|---------------|-----------------|-----------------|-----------------|-----------------|----------------------|-------------------|-----------------|------------------|-----------------|
| Bolivia       |                 |                 | <b>3.4438ns</b> | <b>1.5357ns</b> | <b>6.8250ns</b>      | 0.0000***         | 0.5778***       | 3.6444*          | 2.7000ns        |
| Brazil        |                 |                 | <b>3.4438ns</b> | <b>1.5357ns</b> | <b>6.8250ns</b>      | 0.0000***         | 0.5778***       | 3.6444*          | 2.7000ns        |
| Peru          | <b>0.2219ns</b> | <b>0.2219ns</b> |                 | <b>3.8117ns</b> | <b>7.2933ns</b>      | 3.0813*           | 3.0551**        | 5.1460ns         | 5.0321ns        |
| Ecuador       | <b>0.0089ns</b> | <b>0.0089ns</b> | <b>0.1299ns</b> |                 | <b>6.5350ns</b>      | 1.3437***         | 1.5877***       | 4.0088ns         | 3.4643ns        |
| Ecuador Anarr | <b>0.0488ns</b> | <b>0.0488ns</b> | <b>0.0624ns</b> | <b>0.0177ns</b> |                      |                   | 5.6127***       | 7.8032ns         | 8.5125ns        |
| Costa Rica    | 1.0000***       | 1.0000**        | 0.2319*         | 0.7267***       |                      |                   | <b>0.5098ns</b> | <b>3.2157*</b>   | <b>2.2500*</b>  |
| Mexico        | 0.8819***       | 0.8819***       | 0.2500**        | 0.6949***       | 0.3524***            | <b>0.0631ns</b>   |                 | <b>3.1667**</b>  | <b>2.3778*</b>  |
| USA           | 0.2126*         | 0.2126*         | -0.0177ns       | 0.1189ns        | 0.0549ns             | <b>0.2831*</b>    | <b>0.2963**</b> |                  | <b>4.8741ns</b> |
| Ireland       | 0.1562ns        | 0.1562ns        | -0.0561ns       | 0.0055ns        | 0.0034ns             | <b>0.3889*</b>    | <b>0.3565*</b>  | <b>-0.0402ns</b> |                 |

Significance was evaluated by performing 1000 permutations for each data set including incompatible sites and recombinant sequences.

Comparisons within populations of South American and within non-South American populations are in bold.

Ecuador Anarr: Ecuadorian population including isolates from *S. tetrapetalum*

ns, not significant; \*, 0.01<0.05; \*\*, 0.001<P<0.01; \*\*\*, P<0.001
