# Supplementary material
Source: PubMed Central journal article supplement (PMC1805513)
Supplement: pnas_0611479104_6.pdf [file pnas_0611479104_6.pdf]

**Table 5** Population subdivision at nuclear loci according to Hudson's test statistics Ks (upper right matrix) and Kst (lower left matrix)

|            | <b>Bolivia</b>   | <b>Brazil</b>    | <b>Peru</b>      | <b>Ecuador</b>   | <b>Costa Rica</b> | <b>Mexico</b>    | <b>USA</b>       | <b>Ireland</b>  |
|------------|------------------|------------------|------------------|------------------|-------------------|------------------|------------------|-----------------|
| Bolivia    |                  | <b>4.363ns</b>   | <b>2.4088***</b> | <b>2.5347***</b> | 1.4546***         | 2.2811***        | 4.2463ns         | 3.1320*         |
| Brazil     | <b>-0.0454ns</b> |                  | <b>2.4088***</b> | <b>2.5347***</b> | 1.4546***         | 2.2811***        | 4.2463ns         | 3.1320*         |
| Peru       | <b>0.2947***</b> | <b>0.2947***</b> |                  | <b>1.5359ns</b>  | 1.0543***         | 1.5738ns         | 2.4959*          | 1.8959ns        |
| Ecuador    | <b>0.2947***</b> | <b>0.2947***</b> | <b>-0.0088ns</b> |                  | 0.3563***         | 1.1965ns         | 2.6691*          | 1.6291*         |
| Costa Rica | 0.3636***        | 0.3636***        | 0.1075***        | 0.2364***        |                   | <b>0.6864***</b> | <b>1.6633***</b> | <b>0.8833**</b> |
| Mexico     | 0.2920***        | 0.2929***        | -0.0007ns        | -0.0155ns        | <b>0.1829***</b>  |                  | <b>2.4012***</b> | <b>1.6584**</b> |
| USA        | 0.0348ns         | 0.0348ns         | 0.0484*          | 0.0851*          | <b>0.1251***</b>  | <b>0.0971***</b> |                  | <b>3.1833ns</b> |
| Ireland    | 0.1275*          | 0.1275*          | 0.0202ns         | 0.0513*          | <b>0.0444**</b>   | <b>0.0631*</b>   | <b>0.0007ns</b>  |                 |

Significance was evaluated by performing 1000 permutations for each data set including incompatible sites and recombinant sequences.

Comparisons within populations of South America and within non-South American populations are in bold ns, not significant; \*, 0.01<0.05; \*\*, 0.001<P<0.01; \*\*\*, P<0.001
