# Supplementary material
Source: PubMed Central journal article supplement (PMC1805513)
Supplement: pnas_0611479104_7.pdf [file pnas_0611479104_7.pdf]

**Table 6.** Isolation model parameter estimates for South American and non South American populations based on variation in nuclear and mitochondrial loci.

| Parameter  | Nuclear            | Mitochondrial       |
|------------|--------------------|---------------------|
| $\theta_1$ | 2.85 (0.80-5.58)   | 4.95 (0.18-14.79)   |
| $\theta_2$ | 14.06              | 7.21 (0.56-18.03)   |
| $\theta_A$ | 14.51 (4.64-26.44) | 45.38 (22.28-71.26) |
| t          | 1.64 (0.08-7.76)   | 1.39                |
| $m_1$      | 4.35               | 4.03                |
| $m_2$      | 14.63 (7.83-19.99) | 2.57 (0.01-10.23)   |

In estimating these parameters the inheritance scalar was set to 1.0 and 0.25 for the nuclear and mitochondrial loci, respectively. In the table, the parameters are as follows:  $\theta_1$ ,  $\theta_2$ , and  $\theta_A$ , are the mean population mutation rates for South American (SA), Non South American (NSA) and the ancestral population, respectively; t, is the mean time of divergence of SA and NSA populations from a common ancestor;  $m_1$  is the mean number of migrants into SA;  $m_2$  is the mean number of migrants into NSA. The 90% highest posterior density interval is shown in parentheses for those parameters in which the complete posterior distribution was estimated from the data.
