# Supplementary material
Source: PubMed Central journal article supplement (PMC1805513)
Supplement: pnas_0611479104_8.pdf [file pnas_0611479104_8.pdf]

**Table 7** Identity of haplotypes of *Phytophthora infestans* inferred from mitochondrial and nuclear gene sequences

| <b>Locus</b>                      | <b>Haplotype<br/>(Frequency)</b> | <b>Isolates</b>                                                                                                                                                                                                                                                                                                                                                                                                                                                                                                                                                                                                                                                               | <b>Population</b>                               |
|-----------------------------------|----------------------------------|-------------------------------------------------------------------------------------------------------------------------------------------------------------------------------------------------------------------------------------------------------------------------------------------------------------------------------------------------------------------------------------------------------------------------------------------------------------------------------------------------------------------------------------------------------------------------------------------------------------------------------------------------------------------------------|-------------------------------------------------|
| <b>Mitochondrial</b><br>(P3+P4)   | H1 (23)                          | B124,B189, B193, B217, B219, BOL9, BOL12, BOL14, 3090, 3094, 3152, 3198, 3199, 3298, 3300, PCZ026, PCZ098, PCZ118, PPA008, PPU003, 21A93, 15/99, 3/99                                                                                                                                                                                                                                                                                                                                                                                                                                                                                                                         | Brazil, Bolivia, Ecuador, Peru, Ireland         |
|                                   | H2 (24)                          | 3153, PER802, PER808, PER812, PCZ007, PCZ050, PPU100, F7, ZE, 51, 52, 141, 151, 152, Pic97224, Pic97322, Pic97370, Pic97605, Pic97620, US1, US7, US15, 12/94, 16/99                                                                                                                                                                                                                                                                                                                                                                                                                                                                                                           | Ecuador, Peru, Costa Rica, Mexico, USA, Ireland |
|                                   | H3 (1)                           | Pic97207                                                                                                                                                                                                                                                                                                                                                                                                                                                                                                                                                                                                                                                                      | Mexico                                          |
|                                   | H4 (1)                           | Pic97388                                                                                                                                                                                                                                                                                                                                                                                                                                                                                                                                                                                                                                                                      | Mexico                                          |
|                                   | H5 (3)                           | Pic97180, Pic97652, Pic98305                                                                                                                                                                                                                                                                                                                                                                                                                                                                                                                                                                                                                                                  | Mexico                                          |
|                                   | H6 (2)                           | 3165, 3167                                                                                                                                                                                                                                                                                                                                                                                                                                                                                                                                                                                                                                                                    | Ecuador                                         |
|                                   | H7 (4)                           | US6, US11, US12, US13                                                                                                                                                                                                                                                                                                                                                                                                                                                                                                                                                                                                                                                         | USA                                             |
|                                   | H8 (2)                           | US14, US17                                                                                                                                                                                                                                                                                                                                                                                                                                                                                                                                                                                                                                                                    | USA                                             |
|                                   | H9 (1)                           | PHU006                                                                                                                                                                                                                                                                                                                                                                                                                                                                                                                                                                                                                                                                        | Peru                                            |
|                                   | H10 (1)                          | 3253                                                                                                                                                                                                                                                                                                                                                                                                                                                                                                                                                                                                                                                                          | Ecuador                                         |
| <b>Nuclear</b><br>(IntronRas+RAS) | H1 (19)                          | B40, B124, B189, B193, B217, B219, BOL3, BOL12, BOL13, BOL14, BOL15, BOL16, PCZ007, PCZ050, US6, US8, US11, US14, 3/99                                                                                                                                                                                                                                                                                                                                                                                                                                                                                                                                                        | Brazil, Bolivia, Peru, USA, Ireland             |
|                                   | H2 (93)                          | B40A, B124A, B189A, B193A, B217A, B219A, BOL3A, BOL12A, BOL13A, BOL14A, BOL15A, BOL16A, PER800, PER802, PER804, PER808, PER812, PER832, PCZ007A, PCZ050A, PCZ026, PCZ033, PCZ098, PCZ118, PHU006, POX004, PCO038, PPA008, PPU003, PPU100, 3090, 3092, 3152, 3153, 3154, 3154A, 3198, 3300, Pic97620, Pic97620A, Pic97224, Pic97322, Pic97605, Pic97370, Pic97630, Pic97652, Pic97652A, Pic97180, Pic98372, Pic98301, Pic98366, CI, CIA, DR4, DR4A, F7, F7A, GB-2, GB-2A ZB, ZBA, ZE, ZEA, 51, 51A, 52, 52A, 61, 61A, 141, 141A, 151, 151A, 152, 152A, US1, US6A, US7, US8A, US14A, US15, US17, 6/95, 6/95A, 31/95, 31/95A, 18/94, 18/94A, 21A93, 21A93A, 12/94, 12/99, 12/99A | All                                             |

|          |                                                                                                                                                                                      |                                     |
|----------|--------------------------------------------------------------------------------------------------------------------------------------------------------------------------------------|-------------------------------------|
| H3 ( 2)  | US7A, US17A                                                                                                                                                                          | USA                                 |
| H4 (14)  | PER800A, PER802A, PER804A, PER808A, PER812A, PER32A, PPU100A, 3090A, 3153A, Pic97180A, Pic97207, Pic98366A, US1A, 3/99A                                                              | Ecuador, Peru, Mexico, USA, Ireland |
| H5 ( 1)  | Pic97207A                                                                                                                                                                            | Mexico                              |
| H6 (20)  | PCZ026A, PCZ033A, PCZ098A, PCZ118A, PHU006A, POX004A, PCO038A, PPA008A, PPU003A, 3092A, 3152A, 3198A, 3300A, Pic97224A, Pic97370A, Pic97388, Pic97388A, Pic97630A, Pic98372A, 12/94A | Peru, Ecuador, Mexico, Ireland      |
| H7 ( 1)  | 16/99A                                                                                                                                                                               | Ireland                             |
| H8 ( 1)  | 16/99                                                                                                                                                                                | Ireland                             |
| H9 ( 1)  | Pic97322A                                                                                                                                                                            | Mexico                              |
| H10 ( 1) | Pic97605A                                                                                                                                                                            | Mexico                              |
| H11 ( 1) | Pic98301A                                                                                                                                                                            | Mexico                              |
| H12 ( 1) | US11A, US15A                                                                                                                                                                         | USA                                 |

---

Haplotype number and frequency (i.e., the number of the haplotype in the sample) is shown in parentheses.

For the nuclear locus, the number of haplotypes in the sample refers to the number of chromosomes, since *P. infestans* is a diploid organism. The same isolate can carry two different haplotypes. For the mitochondrial locus, the number of haplotypes refers to the number of isolates.

For the mitochondrial genealogy, one isolate from Peru (PHU006) represented a unique haplotype (H9) and an Ecuadorian isolate (3253) was inferred as recombinant haplotype (H10) .

For the nuclear genealogy, inferred recombinant haplotypes: H9 (Pic97322A); H10 (Pic97605A); H11 (98301A); and H12 (US11A-980059 and US15A-80787-94L) were excluded from analysis that assume no recombination in the history of the sample.
