# Supplementary material
Source: PubMed Central journal article supplement (PMC1805513)
Supplement: pnas_0611479104_9.pdf [file pnas_0611479104_9.pdf]

**Table 8** Isolates of *Phytophthora infestans* used in this study

| Geographical<br>Origin/Isolate<br>Code | Host                   | Year<br>Collected | Mating<br>Type | mtDNA<br>Haplotype | Allozyme<br>Genotype |            | RG-57<br>Lineage |             |  |
|----------------------------------------|------------------------|-------------------|----------------|--------------------|----------------------|------------|------------------|-------------|--|
|                                        |                        |                   |                |                    | <i>Gpi</i>           | <i>Pep</i> |                  |             |  |
| Bolivia                                |                        |                   |                |                    |                      |            |                  |             |  |
| BOL 3                                  | Potato                 | —                 | A2             | IIa                | 100/100              | —          | BR-1             | PROINPA     |  |
| BOL 9                                  | Potato                 | —                 | A2             | IIa                | 100/100              | —          | BR-1             | PROINPA     |  |
| BOL12                                  | Potato                 | —                 | A2             | IIa                | 100/100              | —          | BR-1             | PROINPA     |  |
| BOL13                                  | Potato                 | —                 | A2             | IIa                | 100/100              | —          | BR-1             | PROINPA     |  |
| BOL14                                  | Potato                 | —                 | A2             | IIa                | 100/100              | —          | BR-1             | PROINPA     |  |
| BOL15                                  | Potato                 | —                 | A2             | IIa                | 100/100              | —          | BR-1             | PROINPA     |  |
| BOL16                                  | Potato                 | —                 | A2             | IIa                | 100/100              | —          | BR-1             | PROINPA     |  |
| Brazil                                 |                        |                   |                |                    |                      |            |                  |             |  |
| B040                                   | Potato                 | 1998              | A2             | IIa                | 100/100              | —          | BR-1             | E. Mizubuti |  |
| B124                                   | Potato                 | 1998              | A2             | IIa                | 100/100              | —          | BR-1             | E. Mizubuti |  |
| B189                                   | Potato                 | 1998              | A2             | IIa                | 100/100              | —          | BR-1             | E. Mizubuti |  |
| B193                                   | Potato                 | 1998              | A2             | IIa                | 100/100              | —          | BR-1             | E. Mizubuti |  |
| B217                                   | Potato                 | 1998              | A2             | IIa                | 100/100              | —          | BR-1             | E. Mizubuti |  |
| B219                                   | Potato                 | 1998              | A2             | IIa                | 100/100              | —          | BR-1             | E. Mizubuti |  |
| Peru                                   |                        |                   |                |                    |                      |            |                  |             |  |
| PER800                                 | Potato                 | 1985              | A1             | Ib                 | 86/100               | 92/100     | US-1             | P. Tooley   |  |
| PER802                                 | Potato                 | 1985              | A1             | Ib                 | 86/100               | 92/100     | US-1             | P. Tooley   |  |
| PER804                                 | Potato                 | 1984              | A1             | Ib                 | 86/100               | 92/100     | US-1             | P. Tooley   |  |
| PER808                                 | Potato                 | 1985              | A1             | Ib                 | 86/100               | 92/100     | US-1             | P. Tooley   |  |
| PER812                                 | Potato                 | 1985              | A1             | Ib                 | 86/100               | 92/100     | US-1             | P. Tooley   |  |
| PER832                                 | Potato                 | 1986              | A1             | Ib                 | 86/100               | 92/100     | US-1             | P. Tooley   |  |
| PCZ007                                 | Potato                 | 1997              | A1             | Ia                 | 100/100              | 100/100    | PE-3             | G. Forbes   |  |
| PCZ050                                 | Potato                 | 1997              | A1             | Ia                 | 100/100              | 100/100    | PE-3             | G. Forbes   |  |
| PCZ026                                 | Potato                 | 1997              | A1             | IIa                | 90/100               | 96/100     | PE-6             | G. Forbes   |  |
| PCZ033                                 | Potato                 | 1997              | A1             | IIa                | 90/100               | 96/100     | EC1.1            | G. Forbes   |  |
| PCZ098                                 | Potato                 | 1997              | A1             | IIa                | 90/100               | 96/100     | EC1.2            | G. Forbes   |  |
| PCZ118                                 | Potato                 | 1997              | A1             | IIa                | 90/100               | 96/100     | EC1.2            | G. Forbes   |  |
| PHU006                                 | Potato                 | 1996              | A1             | IIa                | 90/100               | 96/100     | EC-1             | G. Forbes   |  |
| POX004                                 | Potato                 | 1997              | A1             | IIa                | 90/100               | 96/100     | EC-1             | G. Forbes   |  |
| PCO038                                 | Potato                 | 1997              | A1             | IIa                | 90/100               | 96/100     | EC-1             | G. Forbes   |  |
| PPA008                                 | Potato                 | 1998              | A1             | IIa                | ND                   | ND         | ND               | G. Forbes   |  |
| PPU003                                 | Potato                 | 1997              | A1             | IIa                | ND                   | ND         | ND               | G. Forbes   |  |
| PPU100                                 | Potato                 | 1997              | A1             | Ib                 | ND                   | ND         | ND               | G. Forbes   |  |
| Ecuador                                |                        |                   |                |                    |                      |            |                  |             |  |
| 3090                                   | <i>Solanum phureja</i> | —                 | A1             | IIa                | 90/100               | 96/100     | EC-1             | G. Forbes   |  |
| 3092                                   | <i>S. phureja</i>      | —                 | A1             | IIa                | 90/100               | 96/100     | EC-1             | G. Forbes   |  |
| 3094                                   | <i>S. phureja</i>      | —                 | A1             | IIa                | 90/100               | 96/100     | EC-1             | G. Forbes   |  |
| 3152                                   | <i>S. andreaenum</i>   | —                 | A1             | IIa                | 90/100               | 96/100     | EC-1             | G. Forbes   |  |
| 3153                                   | <i>S. andreaenum</i>   | —                 | A1             | Ib                 | 86/100               | 92/100     | US-1             | G. Forbes   |  |
| 3154                                   | <i>S. andreaenum</i>   | —                 | A1             | IIa                | 90/100               | 96/100     | EC-1             | G. Forbes   |  |
| 3163                                   | <i>S. tetrapetalum</i> | —                 | A2             | Ic                 | 100/100              | 76/100     | EC-2             | G. Forbes   |  |

| Geographical Origin/Isolate Code | Host                   | Year Collected | Mating Type | mtDNA Haplotype | Allozyme    | RG-57 Lineage | Source |              |
|----------------------------------|------------------------|----------------|-------------|-----------------|-------------|---------------|--------|--------------|
| 3165                             | <i>S. tetrapetalum</i> | —              |             |                 | 100/100     | 76/100        | EC-2   | G. Forbes    |
| 3166                             | <i>S. tetrapetalum</i> | —              | A2          | Ic              | 100/100     | 76/100        | EC-2   | G. Forbes    |
| 3167                             | <i>S. tetrapetalum</i> | —              | A2          | Ic              | 100/100     | 76/100        | EC-2   | G. Forbes    |
| 3198                             | <i>S. tuquerense</i>   | —              | A1          | IIa             | 90/100      | 96/100        | EC-1   | G. Forbes    |
| 3199                             | <i>S. tuquerense</i>   | —              | A1          | IIa             | 90/100      | 96/100        | EC-1   | G. Forbes    |
| 3253                             | <i>S. columbianum</i>  | —              | A1          | IIa             | 90/100      | 96/100        | EC-1   | G. Forbes    |
| 3298                             | <i>S. paucijugum</i>   | —              | A1          | IIa             | 90/100      | 96/100        | EC-1   | G. Forbes    |
| 3300                             | <i>S. paucijugum</i>   | —              | A1          | IIa             | 90/100      | 96/100        | EC-1   | G. Forbes    |
| Costa Rica                       |                        |                |             |                 |             |               |        |              |
| CI                               | Potato                 | 2000           | A1          | Ia              | 100/100     | 94/100        | CR-1   | A. Brenes    |
| DR4                              | Potato                 | 2001           | A1          | Ia              | 100/100     | 94/100        | CR-1   | A. Brenes    |
| F7                               | Potato                 | 2001           | A1          | Ia              | 100/100     | 94/100        | CR-1   | A. Brenes    |
| GB-2                             | <i>S. longiconicum</i> | 2001           | A1          | Ia              | 100/100     | 94/100        | CR-1   | A. Brenes    |
| ZB                               | Potato                 | 2000           | A1          | Ia              | 100/100     | 94/100        | CR-1   | A. Brenes    |
| ZE                               | Potato                 | 2001           | A1          | Ia              | 100/100     | 94/100        | CR-1   | A. Brenes    |
| 51                               | <i>S. longiconicum</i> | 2003           | A1          | Ia              | 100/100     | ND            | CR-1   | A. Brenes    |
| 52                               | <i>S. longiconicum</i> | 2003           | A1          | Ia              | 100/100     | ND            | CR-1   | A. Brenes    |
| 61                               | Potato                 | 2003           | A1          | Ia              | 100/100     | ND            | CR-1   | A. Brenes    |
| 141                              | Potato                 | 2003           | A1          | Ia              | 100/100     | ND            | CR-1   | A. Brenes    |
| 151                              | Potato                 | 2003           | A1          | Ia              | 100/100     | ND            | CR-1   | A. Brenes    |
| 152                              | Potato                 | 2003           | A1          | Ia              | 100/100     | ND            | CR-1   | A. Brenes    |
| Mexico                           |                        |                |             |                 |             |               |        |              |
| PIC97180                         | Potato                 | 1997           | A1          | Ia              | 86/122      | 92/100        | ND     | N. Grundwald |
| PIC97207                         | Potato                 | 1997           | A1          | Ia              | 100/122     | 100/100       | ND     | N. Grundwald |
| PIC97224                         | Potato                 | 1997           | A2          | Ia              | 100/122     | 100/100       | ND     | N. Grundwald |
| PIC97322                         | Potato                 | 1997           | A1          | Ia              | 100/122     | 78/100        | ND     | N. Grundwald |
| PIC97370                         | Potato                 | 1997           | A2          | Ia              | 86/100      | 100/100       | ND     | N. Grundwald |
| PIC97388                         | Potato                 | 1997           | A2          | Ia              | 100/122     | 92/100        | ND     | N. Grundwald |
| PIC97605                         | Potato                 | 1997           | A1          | Ia              | 86/100      | 96/100        | ND     | N. Grundwald |
| PIC97620                         | Potato                 | 1997           | A1          | Ia              | 100/122     | 96/100        | ND     | N. Grundwald |
| PIC97630                         | Potato                 | 1997           | A2          | Ia              | 86/122      | 92/92         | ND     | N. Grundwald |
| PIC97652                         | Potato                 | 1997           | A2          | Ia              | 100/122     | 100/100       | ND     | N. Grundwald |
| PIC98301                         | Potato                 | 1998           | A2          | Ia              | 100/100     | 100/100       | ND     | N. Grundwald |
| PIC98305                         | Potato                 | 1998           | A1          | Ia              | 100/100     | 92/100        | ND     | N. Grundwald |
| PIC98366                         | <i>S. demissum</i>     | 1998           | A1          | Ia              | 86/100      | 100/100       | ND     | N. Grundwald |
| PIC98369                         | <i>S. demissum</i>     | 1998           | A1          | Ia              | 100/122     | 100/100       | ND     | N. Grundwald |
| PIC98372                         | <i>S. demissum</i>     | 1998           | A2          | Ia              | 86/122      | 100/100       | ND     | N. Grundwald |
| PIC98388                         | <i>S. demissum</i>     | 1998           | A1          | Ia              | 100/100     | 100/100       | ND     | N. Grundwald |
| PIC98392                         | <i>S. demissum</i>     | 1998           | A2          | Ia              | 86/122      | 100/100       | ND     |              |
| US                               |                        |                |             |                 |             |               |        |              |
| 94-1                             | Potato                 | 1994           | A1          | Ib              | 86/100      | 92/100        | US-1   | J. Ristaino  |
| 94-52                            | Potato                 | 1994           | A1          | IIb             | 100/100     | 92/100        | US-6   | W. Fry       |
| 94-53                            | Potato                 | 1994           | A2          | Ia              | 100/111     | 100/100       | US-7   | W. Fry       |
| 94-8-4                           | Potato                 | 1994           | A2          | Ia              | 100/111/122 | 100/100       | US-8   | J. Ristaino  |
| 980059                           | Potato                 | 1998           | A1          | IIb             | 100/111     | 100/100       | US-11  | W. Fry       |
| 940494                           | Tomato                 | 1994           | A1          | IIb             | 100/111     | 92/100        | US-12  | W. Fry       |
| 940504                           | Potato                 | 1994           | A2          | IIb             | 100/100     | 100/100       | US-13  | W. Fry       |

**Table 9** Primers, target sequences and positions for amplification for nuclear and mitochondrial genes in *Phytophthora infestans*

| Target DNA           | Primer  | Primer Sequence               | Primer Length (bp) | Primer Position | Source                   |
|----------------------|---------|-------------------------------|--------------------|-----------------|--------------------------|
| <i>Mitochondrial</i> |         |                               |                    |                 |                          |
| P3                   | F3      | 5` ATGGTAGAGCGTGGAATCAT 3`    | 21                 | 2893 - 2913     | Griffith and Shaw (1998) |
|                      | R3      | 5` AATACCGCCTTTGGGTCCATT 3`   | 21                 | 4178 - 4198     | Griffith and Shaw (1998) |
| P4                   | F4      | 5` TGGTCATCCAGAGGTTTATGTT 3`  | 22                 | 9379 - 9400     | Griffith and Shaw (1998) |
|                      | R4      | 5` CCGATACCGATAACCAGCACCAA 3` | 22                 | 10321 -10342    | Griffith and Shaw (1998) |
| <i>Nuclear</i>       |         |                               |                    |                 |                          |
| Intron Ras           | IRF     | 5` TTGCAGCACAACCCAAGACG 3`    | 20                 | 442 - 461       | Gomez et al (2003)       |
|                      | IRR     | 5` TGCACGTACTATTCGGGGTTC 3`   | 21                 | 768 - 789       | Gomez et al (2003)       |
| Ras                  | RASF    | 5` CGTGTCTGCTTCTCCGTTTCG 3`   | 21                 | 916 - 936       | Gomez et al (2003)       |
|                      | RASR    | 5` CCAGGCTTTCGGCAAATTCC 3`    | 20                 | 1496 - 1515     | Gomez et al (2003)       |
| $\beta$ -Tubulin     | TUB901  | 5` TACGACATTTGCTTCCG 3`       | 17                 | 901-918         | A. Levesque(per. com)    |
|                      | TUB1401 | 5` CGCTTGAACATCTCCTGG3`       | 18                 | 1383-1401       | A. Levesque(per. com)    |

Location of the primer within the original DNA sequence, GenBank accession U17009 for the mitochondrial genes and U30474 for the RAS genes. PCR conditions were according to Griffith and Shaw (33).

For the mitochondrial regions, the reaction conditions were: first, 1.5 min at 94C, followed by 40 cycles of denaturation at 94C
