# Supplementary material
Source: PubMed Central journal article supplement (PMC1805513)
Supplement: pnas_0611479104_10.pdf [file pnas_0611479104_10.pdf]

**Table 9** Primers, target sequences and positions for amplification for nuclear and mitochondrial genes in *Phytophthora infestans*

| Target DNA           | Primer  | Primer Sequence               | Primer Length (bp) | Primer Position | Source                   |
|----------------------|---------|-------------------------------|--------------------|-----------------|--------------------------|
| <i>Mitochondrial</i> |         |                               |                    |                 |                          |
| P3                   | F3      | 5` ATGGTAGAGCGTGGAATCAT 3`    | 21                 | 2893 - 2913     | Griffith and Shaw (1998) |
|                      | R3      | 5` AATACCGCCTTTGGGTCCATT 3`   | 21                 | 4178 - 4198     | Griffith and Shaw (1998) |
| P4                   | F4      | 5` TGGTCATCCAGAGGTTTATGTT 3`  | 22                 | 9379 - 9400     | Griffith and Shaw (1998) |
|                      | R4      | 5` CCGATACCGATAACCAGCACCAA 3` | 22                 | 10321 -10342    | Griffith and Shaw (1998) |
| <i>Nuclear</i>       |         |                               |                    |                 |                          |
| Intron Ras           | IRF     | 5` TTGCAGCACAACCCAAGACG 3`    | 20                 | 442 - 461       | Gomez et al (2003)       |
|                      | IRR     | 5` TGCACGTACTATTCGGGGTTC 3`   | 21                 | 768 - 789       | Gomez et al (2003)       |
| Ras                  | RASF    | 5` CGTGTCTGCTTCTCCGTTTCG 3`   | 21                 | 916 - 936       | Gomez et al (2003)       |
|                      | RASR    | 5` CCAGGCTTTCGGCAAATTCC 3`    | 20                 | 1496 - 1515     | Gomez et al (2003)       |
| $\beta$ -Tubulin     | TUB901  | 5` TACGACATTTGCTTCCG 3`       | 17                 | 901-918         | A. Levesque(per. com)    |
|                      | TUB1401 | 5` CGCTTGAACATCTCCTGG3`       | 18                 | 1383-1401       | A. Levesque(per. com)    |

Location of the primer within the original DNA sequence, GenBank accession U17009 for the mitochondrial genes and U30474 for the RAS genes. PCR conditions were according to Griffith and Shaw (33).

For the mitochondrial regions, the reaction conditions were: first, 1.5 min at 94C, followed by 40 cycles of denaturation at 94C
