# Supplementary material
Source: PubMed Central journal article supplement (PMC1805513)

**A)**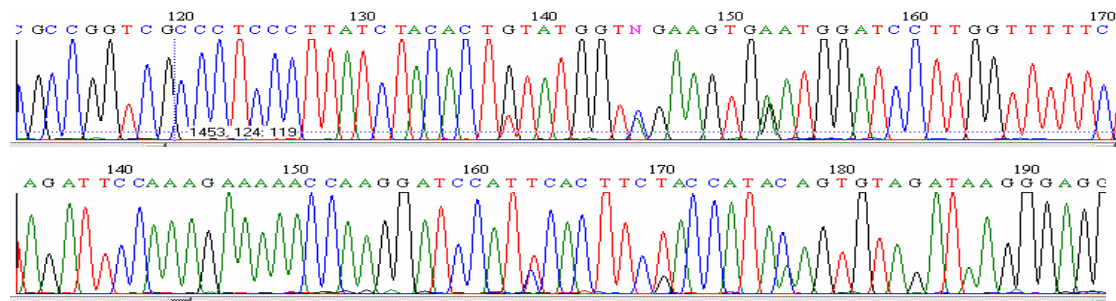**B)**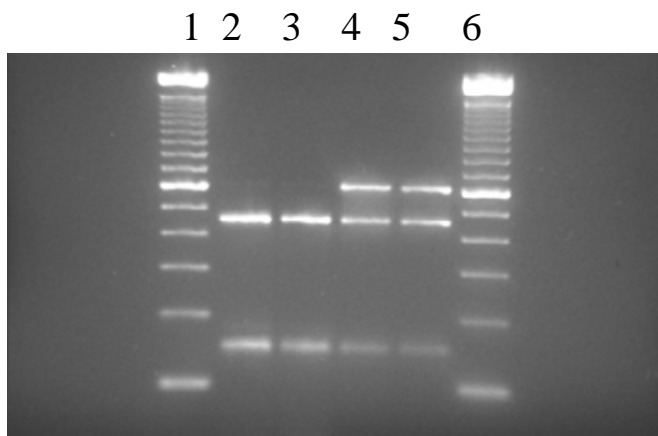**C)**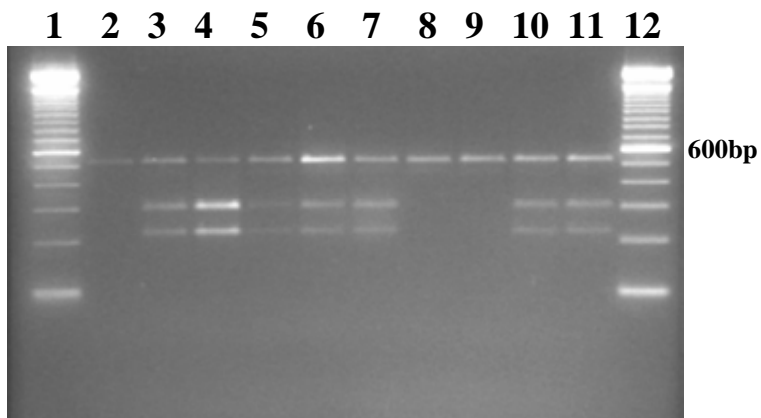

Supplement: pnas_0611479104_1.pdf [file pnas_0611479104_1.pdf]

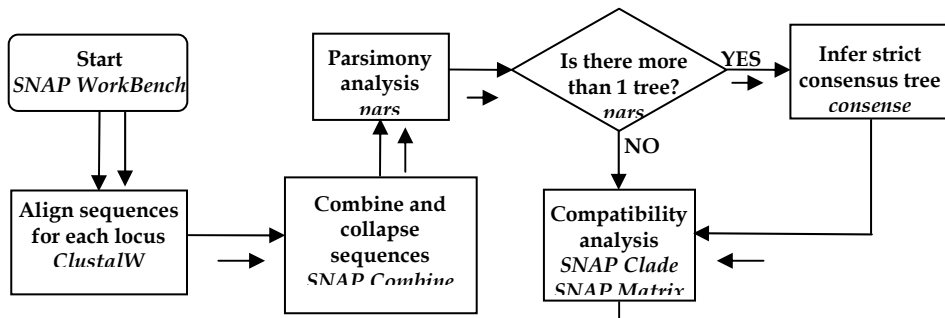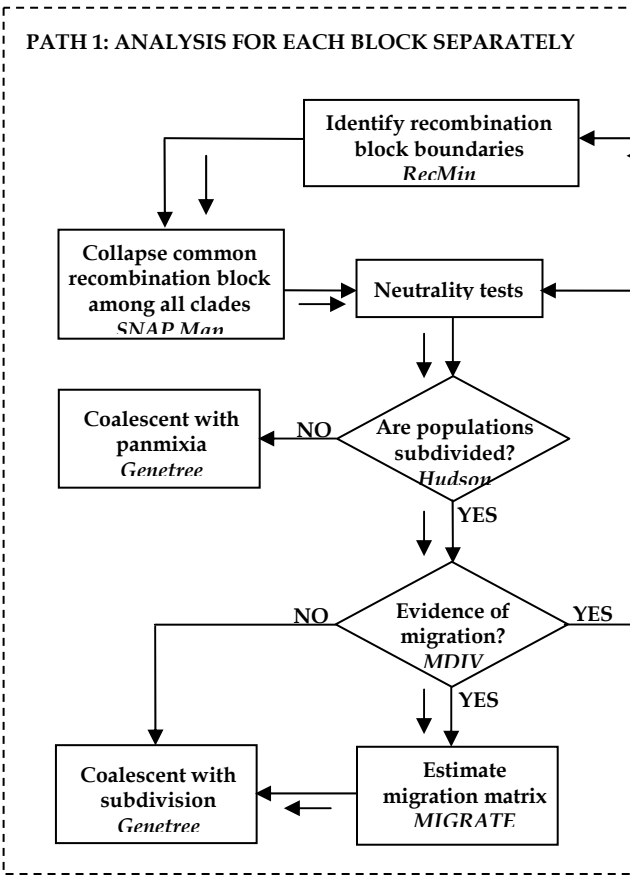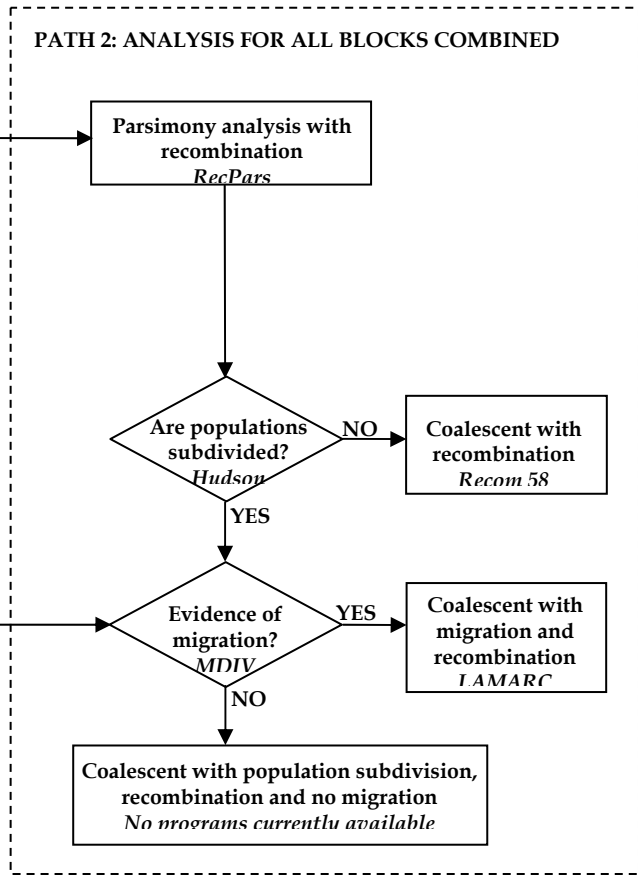

Supplement: pnas_0611479104_2.pdf [file pnas_0611479104_2.pdf]
